# Supplementary material for: Identification of Novel Candidate Genes for Type 2 Diabetes From a Genome-Wide Association Scan in the Old Order Amish
Source: Oxford University Press journal article supplement (doi:10.2337/db07-0457), 2007-09-11
Supplement: db070457-sup-additionaltable2forrotterconsortium.doc [file db070457-sup-additionaltable2forrotterconsortium.doc]

|  | **FHS** | **Mex-Am** | **Pima C/C** | **Pima family** | **Amish** |
| --- | --- | --- | --- | --- | --- |
| **N** | 1,087 | 281 cases/280 controls | 300 cases/334 controls | 172 sibships | 124 cases/295 controls |
| **Type** | Population, family-based | Case/control | Case/control | Family | Case/control |
| **Ethnicity** | Non-Hispanic White | Mexican-American | American Indian | American Indian | Non-Hispanic White |
| **Male/Female** | 527/560 | Cases: 108/173 Controls: 69/211 | Cases: 114/186 Controls: 160/174 | Cases: 48/92 Controls: 57/64 | Cases: 41/83 Controls: 153/142 |
| **Mean age (yrs)** | 51.5 ± 9.8 | Cases: 57.7 ± 10.8 Controls: | Cases: 19.2 ± 4.5 Controls: 55.5 ± 9.8 | Cases: 41.0 ± 8.3 Controls: 27.8 ± 7.9 | Cases: 51.3 ± 10.5 Controls: 64.4 ± 12.9 |
| **Mean BMI (kg/m2)** | 27.5 ± 5.2 | Cases: 31.5 ± 6.2 Controls: | Cases: 38.9 ± 8.4 Controls: 35.4 ± 8.0 | Cases: 38.9 ± 9.3 Controls: 36.9 ± 8.9 | Cases: 29.3 ± 5.8 Controls: 27.4 ± 4.7 |
| **Quantitative glycemic traits analyzed** | FPG; tFPG; HbA1c; FI; HOMA-IR; Gutt ISI 0_120 |  |  |  | FASTG; glucose AUC; insulin AUC; HOMA-IR; insulin secretion index |
| **Notes** | 91 cases of incident diabetes | Controlled for admixture | Age of onset <25 | Sibships overlap with C/C | Cases have (+) FH; active lifestyle |
| **SNPs analyzed** | 66,543 | 88,702 | 80,044 | 80,044 | 82,485 |
| **SNPs failed** | 39,205 MAF <10% 4,064 HWE *P* <0.001 10,438 call rate <90% | 19,032 MAF <5% 1562 HWE *P*<0.001 4,818 call rate <85% | 28,215 MAF <1% 2,429 HWE *P* <0.001 5,122 call rate <85% and/or error rate >3% in duplicate samples | 28,215 MAF <1% 2,429 HWE *P* <0.001 5,122 call rate <85% and/or error rate >3% in duplicate samples | 26,816 MAF <5% 2,573 HWE *P*<0.001 1,866 call rate <90% |
| ***P* value thresholds** | Strategy 1: *P* <0.01 in: All 3 glucose traits (FPG, tFPG and HbA1c) or All 3 insulin traits (FI, HOMA-IR and Gutt) or 2 glucose & 2 insulin traits or Incident type 2 diabetes Strategy 2: *P*<0.001 | Primary analysis: P<0.01 for T2D  *In Silico* Replication: *P*<0.05 | In Silico Replication:  *P* < 0.007 in combined within-family and case-control analysis (weighted to give priority to within-family test) Additional Genotyping: *P* < 0.001 in combined within-family and case controls analysis as above | In Silico Replication: *P* < 0.007 in combined within-family and case-control analysis (weighted to give priority to within-family test) Additional Genotyping:  *P* < 0.001 in combined within-family and case controls analysis as above | Primary analysis: *P*<0.01 for T2D Internal replication: T2D *P*<0.01 ***and*** 1 glucose trait (FASTG, GAUC) or 1 insulin trait (ISI, IAUC, HOMA-IR) *P*<0.01 |
| **Replication cohort** | 1,465 unrelated FHS participants (non-overlapping) | 760 overlapping individuals for SNP verification | Non-overlapping Pima Indians: 1207 cases/1627 controls | Non-overlapping Pima Indians: 1207 cases/1627 controls | 427 nondiabetic Amish participants (*295 controls from primary T2D analysis*) |
| ***in silico* replication** | T2D 100K Consortium + DGI 500K | T2D 100K Consortium + DGI 500K | T2D 100K Consortium + DGI 500K | T2D 100K Consortium + DGI 500K | T2D 100K Consortium + DGI 500K |
