# Supplementary material for: Identification of Novel Candidate Genes for Type 2 Diabetes From a Genome-Wide Association Scan in the Old Order Amish
Source: Oxford University Press journal article supplement (doi:10.2337/db07-0457), 2007-09-11
Supplement: db070457onlineappentab1.xls [file db070457onlineappentab1.xls]

## Sheet: S1
Online Supplementary Table 1. Affymetrix GeneChip® Mapping 100K Array quality control data.
Quality Control
Total number of SNPs	116204
Number of HindIII SNPs	57244
Number of XbaI SNPs	58960
Median call rate per HindIII chip	0.974
Median call rate per XbaI chip	0.976
Autosomal SNPs with known positions (Build 36.1)	112990
Monomorphic SNPs	8221
SNPs with MAF<5% (non-monomorphic)	18595
SNPs with callrate < 90%	1866
SNPs out of HWE (p < 0.001)	2573
Total number of analyzable autosomal SNPs	82485
Reproducibility of data.
Duplicate samples genotyped in Affymetrix 100K panel	11
100K duplicate concordance	0.975
SNPs duplicated across Affymetrix 100K and Illumina platforms	61
Samples duplicated across Affymetrix 100K and Illumina platforms	419
Cross-Platform concordance	0.987
Abbreviations: HWE, Hardy-Weinberg equilibrium; MAF, minor allele frequency; SNP, single nucleotide polymorphism
